# Supplementary material
Source: PubMed Central journal article supplement (PMC5746432)

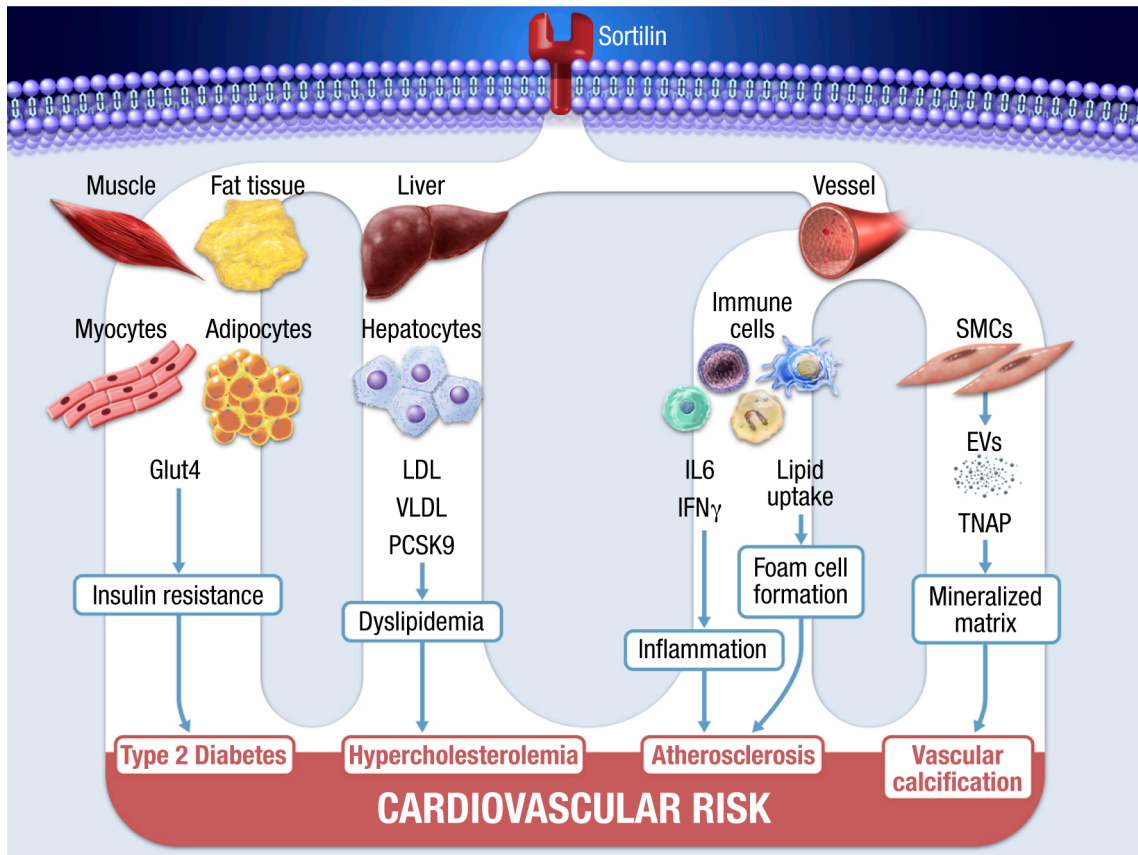

Supplement: NIHMS921112-supplement-Graphic_Abstract_Figure.pdf [file NIHMS921112-supplement-Graphic_Abstract_Figure.pdf]
